# Supplementary material for: Candida albicans Hexokinase 2 Challenges the Saccharomyces cerevisiae Moonlight Protein Model
Source: MDPI journal article supplement (doi:10.3390/microorganisms9040848), 2021-04-15
Supplement: s1 [file s1]

## Supplementary data

**Table S1. *C. albicans* strains used in this study**

| Strains                        | Parent           | Genotype                                                          | Source/reference     |
|--------------------------------|------------------|-------------------------------------------------------------------|----------------------|
| WT (SC5314)                    |                  | Wild-type strain                                                  | Gillium et al., 1984 |
| <i>Cahxk2Δ/Δ</i>               | SC5314           | <i>Δhvk2::FRT/ Δhvk2::FRT</i>                                     | Laurian et al., 2019 |
| <i>Cahxk2D<sup>210</sup>A</i>  | <i>Cahxk2Δ/Δ</i> | <i>Cahxk2D<sup>210</sup>A::FRT/ Cahxk2D<sup>210</sup>A::FRT</i>   | This study           |
| <i>Cahxk2T<sup>15</sup>A</i>   | <i>Cahxk2Δ/Δ</i> | <i>Cahxk2T<sup>15</sup>A::FRT/ Cahxk2T<sup>15</sup>A::FRT</i>     | This study           |
| <i>Cahxk2ΔK<sup>6F16</sup></i> | <i>Cahxk2Δ/Δ</i> | <i>Cahxk2ΔK<sup>6F16</sup>::FRT/ Cahxk2ΔK<sup>6F16</sup>::FRT</i> | This study           |

**Table S2. Plasmids used in this study**

| Plasmids                  | Characteristics                                                                                                                        | Source or reference  |
|---------------------------|----------------------------------------------------------------------------------------------------------------------------------------|----------------------|
| pCaPC1c                   | Wild type genomic region of the <i>CaHVK2</i> gene cloned at the <i>Sph1 Xma1</i> sites of pUC18                                       | Laurian et al., 2019 |
| pCaHVK2T <sup>15</sup> A, | genomic region of the <i>CaHVK2</i> gene containing the T <sup>15</sup> A mutation, cloned at the <i>Sph1 Xma1</i> sites of pUC18      | This study           |
| pCaHVK2K <sup>6F16</sup>  | genomic region of the <i>CaHVK2</i> gene containing the K <sup>6F16</sup> deleted region cloned at the <i>Sph1 Xma1</i> sites of pUC18 | This study           |
| pCaHVK2D <sup>210</sup> A | genomic region of the <i>CaHVK2</i> gene containing the D <sup>210</sup> A mutation, cloned at the <i>Sph1 Xma1</i> sites of pUC18     | This study           |

**Table S3. Primers used in this study**

| Name       | Use                                                                                                                | Sequence 5'→3'                                           |
|------------|--------------------------------------------------------------------------------------------------------------------|----------------------------------------------------------|
| p159 (F)   | <i>CaHXXK2</i> site-directed mutagenesis<br>D <sup>210</sup> A: change D at position 210 for A                     | GTTGATCAAC <b>GCA</b> ACCACAGGTACATTAGTTGCTTCTATG        |
| p160 (R)   | <i>CaHXXK2</i> site-directed mutagenesis<br>D <sup>210</sup> A: change D at position 210 for A                     | TACCTGTGGT <b>TGCG</b> TTGATCAACGCAACAACATCAATTGG        |
| p161 (F)   | <i>CaHXXK2</i> site-directed mutagenesis<br>T <sup>15</sup> A: change T at position 15 for A                       | GAAAGGGAG <b>CA</b> TTCACTGATGTTTCTCCTCAATTATTAGAA<br>GC |
| p162 (R)   | <i>CaHXXK2</i> site-directed mutagenesis<br>T <sup>15</sup> A: change T at position 15 for A                       | CATCAGTGAAT <b>GTCT</b> CCCTTTCTTTTGGAGCTGGTTTTGG        |
| p163 (F)   | <i>CaHXXK2</i> site-directed mutagenesis:<br>deletion of the region between K at<br>position 6 to F at position 16 | CATCTCGGTCCA <b>ACT</b> GATGTTTCTCCTCAATTATTAGAAGC       |
| p164 (R)   | <i>CaHXXK2</i> site-directed mutagenesis:<br>deletion of the region between K at<br>position 7 to F at position 16 | GAAACATCAGTTGGACCGAGATGCACCATTGTAAG                      |
| pHGT12 (F) | Amplification of <i>CaHGT12</i>                                                                                    | GGTACTCAAATTCTTCAAGCGTTC                                 |
| pHGT12 (R) | Amplification of <i>CaHGT12</i>                                                                                    | GACGCCATAACAACACTACCG                                    |
| pACT1 (F)  | Amplification of <i>CaACT1</i>                                                                                     | ATTGTTTCCA <b>ACT</b> GGGACGAT                           |
| pACT1 (R)  | Amplification of <i>CaACT1</i>                                                                                     | GATGTTCTTCTGGAGCAACTCT                                   |
| pICL1 (F)  | Amplification of <i>CaICL1</i>                                                                                     | CTACTTTATCATTGGTGCCACTAACCC                              |
| pICL1 (R)  | Amplification of <i>CaICL1</i>                                                                                     | AGACTCAATGGCAGCTAATTCGTTACC                              |
| pPCK1 (F)  | Amplification of <i>CaPCK1</i>                                                                                     | GGTCCAAAAGTTGTCTCTTAATACCG                               |
| pPCK1 (R)  | Amplification of <i>CaPCK1</i>                                                                                     | GCACCAGTAGATGAGATAGTAGTACC                               |

Nucleotides in bold correspond to the changes inserted by site directed mutagenesis
